# Supplementary material for: Assessing global-scale organic matter reactivity patterns in marine sediments using a lognormal reactive continuum model
Source: Copernicus journal article supplement (doi:10.5194/bg-20-2251-2023), 2023-06-20
Supplement: Supplementary file 1 [file bg-20-2251-2023-supplement.pdf]

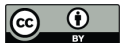

*Supplement of*

## **Assessing global-scale organic matter reactivity patterns in marine sediments using a lognormal reactive continuum model**

**Sinan Xu et al.**

*Correspondence to:* Zijun Wu ([wuzj@tongji.edu.cn](mailto:wuzj@tongji.edu.cn))

The copyright of individual parts of the supplement might differ from the article licence.

1 **1. Details of investigated sites.**

2 **Table S1. Supplementary sources of data for Fig. 3 in the main text.**

| <b>longitude</b> | <b>latitude</b> | <b>Sea area</b>      | <b>Water depth</b> | $\omega$ | $G_{max}$ | <b>Ref.</b> |
|------------------|-----------------|----------------------|--------------------|----------|-----------|-------------|
| (°)              | (°)             | (Ocean)              | (m)                | (cm/a)   | (wt%)     |             |
| 72°45' W         | 42°15' N        | Long Island Sound    | 10                 | 0.2      | 1.7       | (1)         |
| 131°75' E        | 43°11' N        | Amur Bay             | 1                  | 0.3      | 2.9       | (29)        |
| 130°72' E        | 42°61' N        | Ekspeditsii Bight    | 1.5                | 0.4      | 2.1       | (29)        |
| 131°83' E        | 42°96' N        | Voevoda bight        | 2.1                | 0.3      | 6.2       | (29)        |
| 09°08' E         | 56°53.10' N     | Livø Strait          | 7                  | 0.1      | 6.2       | (27)        |
| 04°18' E         | 51°77' N        | Haringvliet Lake     | 7.5                | 1.01     | 4.73      | (26)        |
| 123°29' W        | 48°36' N        | NorthCarolina,USA    | 8                  | 0.15     | 4.5       | (9)         |
| 09°09' E         | 56°50.32' N     | Bjørnsholm Bay       | 10                 | 0.1      | 12        | (27)        |
| 70°63' W         | 41°73.8' N      | Buzzards Bay         | 15                 | 0.2      | 1.9       | (14)        |
| 70°62' W         | 41°74.4' N      | Buzzards Bay         | 16                 | 0.2      | 2.1       | (14)        |
| 71°41' W         | 41°43.9' N      | Rhode Island         | 17                 | 0.2      | 16        | (14)        |
| 89°44' W         | 29°07' N        | Mississippi River    | 20                 | 0.8      | 0.9       | (22)        |
| 89°35' W         | 29°06' N        | Mississippi River    | 20                 | 0.8      | 0.52      | (22)        |
| 73°42' W         | 43°81' S        | Southern Chilean     | 20                 | 0.29     | 1.4       | (23)        |
| 73°51' W         | 43°47' S        | Southern Chilean     | 20                 | 0.29     | 3.2       | (23)        |
| 73°63' W         | 44°62' S        | Southern Chilean     | 20                 | 0.29     | 3.1       | (23)        |
| 73°18' W         | 45°31' S        | Southern Chilean     | 20                 | 0.29     | 1.6       | (23)        |
| 74°46' W         | 44°51' S        | Southern Chilean     | 20                 | 0.29     | 2.4       | (23)        |
| 74°53' W         | 45°68' S        | Southern Chilean     | 20                 | 0.29     | 1.5       | (23)        |
| 13°86' E         | 54°74' N        | Arkona Bassin        | 35                 | 0.048    | 3.8       | (21)        |
| 13°79' E         | 54°80' N        | Arkona Bassin        | 44                 | 0.074    | 4.1       | (21)        |
| 13°66' E         | 54°94' N        | Arkona Bassin        | 44                 | 0.19     | 5.2       | (21)        |
| 13°61' E         | 54°91' N        | Arkona Bassin        | 44                 | 0.215    | 4.9       | (21)        |
| 136°78' W        | 34°29' N        | Ago Bay              | 50                 | 0.2      | 2.5       | (18)        |
| 136°72' W        | 34°30' N        | Ago Bay              | 50                 | 0.2      | 2.4       | (18)        |
| 136°70' W        | 34°25' N        | Ago Bay              | 50                 | 0.2      | 2.48      | (18)        |
| 14°18' E         | 23°46.52' S     | Namibian shelf       | 110                | 0.34     | 12        | (16)        |
| 86°13' W         | 09°37' N        | Costa Rica           | 160                | 0.01     | 2.4       | (20)        |
| 86°11' W         | 09°39' N        | Costa Rica           | 160                | 0.01     | 1.75      | (20)        |
| 86°15' W         | 09°42' N        | Costa Rica           | 160                | 0.01     | 1.6       | (20)        |
| 123°25' W        | 48°32' N        | Saanich Inlet        | 170                | 0.69     | 4.8       | (7)         |
| 05°12' W         | 78°93' N        | East Greenland shelf | 189                | 0.37     | 0.72      | (24)        |
| 12°77' W         | 74°99' N        | East Greenland shelf | 320                | 0.46     | 0.48      | (24)        |
| 04°59' W         | 75°06' N        | Central Greenland    | 272                | 0.09     | 0.62      | (24)        |
| 123°30' W        | 48°37' N        | Saanich Inlet        | 210                | 1.04     | 3.8       | (11)        |
| 77°39' W         | 12°0.5' S       | Peru continental     | 186                | 0.23     | 14        | (2)         |
| 77°40' W         | 12°0.5' S       | Peru continental     | 255                | 0.23     | 7.9       | (2)         |
| 76°50' W         | 13°37.3' S      | Peru continental     | 370                | 0.14     | 20        | (5)         |
| 76°51' W         | 13°37.3' S      | Peru continental     | 370                | 0.04     | 20        | (5)         |
| 77°57' W         | 11°15.1' S      | Peru continental     | 186                | 0.15     | 14        | (5)         |

|           |             |                     |      |         |      |      |
|-----------|-------------|---------------------|------|---------|------|------|
| 78°07' W  | 11°20.6' S  | Peru continental    | 411  | 0.15    | 20   | (4)  |
| 77°24' W  | 12°23' S    | Peruvian margin     | 297  | 0.06    | 17.2 | (33) |
| 77°10' W  | 12°13' S    | Peruvian margin     | 306  | 0.3     | 3.1  | (33) |
| 77°15' W  | 12°17' S    | Peruvian margin     | 409  | 0.5     | 14.8 | (33) |
| 24°59' W  | 71°21' N    | Weddell Sea         | 422  | 0.58    | 0.28 | (25) |
| 120°14' W | 34°19.3' N  | Santa Barbara Basin | 430  | 0.2     | 2.8  | (13) |
| 120°01' W | 34°14.3' N  | Santa Barbara Basin | 578  | 0.2     | 3.2  | (13) |
| 120°02' W | 34°16.0' N  | Santa Barbara Basin | 585  | 0.2     | 2.6  | (13) |
| 12°85' E  | 38°13' N    | Castellammare       | 550  | 0.2     | 1.1  | (28) |
| 12°91' E  | 38°14' N    | Castellammare       | 550  | 0.2     | 0.85 | (28) |
| 146°00' E | 49°44.88' N | Sea of Okhotsk      | 613  | 0.093   | 2.1  | (30) |
| 144°04' E | 54°26.52' N | Sea of Okhotsk      | 685  | 0.022   | 1.7  | (30) |
| 144°42' E | 52°43.88' N | Sea of Okhotsk      | 713  | 0.115   | 1.8  | (30) |
| 144°14' E | 53°50.00' N | Sea of Okhotsk      | 771  | 0.092   | 1.7  | (30) |
| 146°02' E | 48°22.73' N | Sea of Okhotsk      | 1256 | 0.013   | 1.6  | (30) |
| 146°08' E | 48°11.83' N | Sea of Okhotsk      | 1602 | 0.01    | 0.83 | (30) |
| 77°11' W  | 12°14' S    | Peruvian margin     | 695  | 0.3     | 6.1  | (33) |
| 77°35' W  | 12°31' S    | Peruvian margin     | 756  | 0.08    | 2.9  | (33) |
| 77°40' W  | 12°35' S    | Peruvian margin     | 770  | 0.052   | 4.6  | (33) |
| 02°45' W  | 62°79' N    | Shetland Faeroe     | 777  | 0.68    | 1.2  | (24) |
| 119°42' E | 22°29' N    | South China Sea     | 1004 | 0.08    | 0.78 | (32) |
| 38°51' W  | 77°39' N    | Weddell Sea         | 1097 | 0.21    | 0.42 | (25) |
| 31°24' W  | 74°24' N    | Weddell Sea         | 1178 | 0.14    | 0.36 | (25) |
| 09°67' W  | 68°71' N    | Weddell Sea         | 1185 | 0.08    | 0.32 | (25) |
| 27°64' W  | 73°17' N    | Weddell Sea         | 1566 | 0.24    | 0.35 | (25) |
| 22°36' W  | 73°36' N    | Weddell Sea         | 1598 | 0.24    | 0.25 | (25) |
| 27°16' W  | 73°48' N    | Weddell Sea         | 444  | 0.74    | 0.21 | (25) |
| 118°83' W | 32°85' N    | Southern California | 1500 | 0.06    | 6.5  | (23) |
| 65°35' E  | 20°00' N    | Arabian Sea         | 3000 | 0.0024  | 0.56 | (31) |
| 68°33' E  | 15°36' N    | Arabian Sea         | 3500 | 0.0025  | 0.95 | (31) |
| 64°33' E  | 14°24' N    | Arabian Sea         | 3500 | 0.0024  | 0.63 | (31) |
| 65°02' E  | 10°03' N    | Arabian Sea         | 3500 | 0.0012  | 0.53 | (31) |
| 60°31' E  | 16°10' N    | Arabian Sea         | 4000 | 0.0034  | 3.8  | (31) |
| 71°24' W  | 36°10' N    | NW Atlantic         | 4215 | 0.01    | 1.2  | (8)  |
| 70°50' W  | 32°59.3' N  | NW Atlantic         | 4595 | 0.003   | 0.28 | (8)  |
| 60°50' W  | 35°19.8' N  | NW Atlantic         | 5341 | 0.01    | 0.34 | (8)  |
| 136°03' E | 28°59.00' N | Philippine Sea      | 2972 | 0.00006 | 0.34 | (6)  |
| 135°93' E | 29°08.00' N | Shikoku Basin       | 2972 | 0.00006 | 0.5  | (6)  |
| 135°99' E | 29°10.00' N | Shikoku Basin       | 2972 | 0.00006 | 0.42 | (6)  |
| 134°93' E | 28°59.00' N | Shikoku Basin       | 2972 | 0.00002 | 0.27 | (6)  |
| 151°39' W | 13°41.7' N  | the North Pacific   | 5686 | 0.00015 | 0.4  | (10) |
| 148°57' W | 6°13.2' N   | the North Pacific   | 5718 | 0.00019 | 0.23 | (10) |
| 146°09' W | 9°30.5' N   | the North Pacific   | 5004 | 0.00023 | 0.36 | (10) |
| 146°01' W | 9°19.3' N   | the North Pacific   | 5205 | 0.00032 | 0.45 | (10) |

|           |            |                     |      |         |       |      |
|-----------|------------|---------------------|------|---------|-------|------|
| 145°59' W | 9°31.5' N  | the North Pacific   | 5164 | 0.00036 | 0.26  | (10) |
| 144°49' W | 3°59.5' N  | the North Pacific   | 5214 | 0.00036 | 0.22  | (10) |
| 145°01' W | 3°50.2' N  | the North Pacific   | 4599 | 0.00041 | 0.23  | (10) |
| 148°44' W | 9°15.0' N  | the North Pacific   | 4619 | 0.00043 | 0.35  | (10) |
| 148°46' W | 9°06.5' N  | the North Pacific   | 5144 | 0.00058 | 0.32  | (10) |
| 151°39' W | 14°41.7' N | the North Pacific   | 5686 | 0.0002  | 0.2   | (10) |
| 148°47' W | 9°06.5' N  | the North Pacific   | 5189 | 0.0012  | 0.25  | (10) |
| 168°46' W | 65°01.7' S | South flank Pacific | 2930 | 0.00258 | 0.5   | (12) |
| 174°14' W | 66°49.7' S | South flank Pacific | 3260 | 0.0018  | 0.32  | (12) |
| 174°44' W | 62°54.2' S | North flank Pacific | 4139 | 0.00588 | 0.6   | (12) |
| 63°27' W  | 22°54.9' N | Nares Abyssal Plain | 5868 | 0.0005  | 0.3   | (15) |
| 63°26' W  | 22°54.9' N | Nares Abyssal Plain | 5868 | 0.0005  | 0.14  | (15) |
| 63°00' W  | 23°22.3' N | Nares Abyssal Plain | 5878 | 0.0005  | 0.12  | (15) |
| 63°01' W  | 23°22.3' N | Nares Abyssal Plain | 5878 | 0.0005  | 0.008 | (15) |
| 169°04' E | 08°13' N   | Equatorial Pacific  | 4239 | <0.002  | 0.25  | (17) |
| 177°58' E | 07°27' N   | Equatorial Pacific  | 5269 | <0.002  | 0.42  | (17) |
| 175°52' W | 05°03' N   | Equatorial Pacific  | 5867 | <0.002  | 0.6   | (17) |
| 174°54' W | 03°04' N   | Equatorial Pacific  | 3572 | <0.002  | 0.54  | (17) |
| 171°04' W | 00°02' S   | Equatorial Pacific  | 5352 | <0.002  | 0.7   | (17) |
| 168°04' W | 02°26' S   | Equatorial Pacific  | 5361 | <0.002  | 0.52  | (17) |
| 166°37' W | 03°39' S   | Equatorial Pacific  | 5469 | <0.002  | 0.53  | (17) |
| 166°32' W | 09°10' S   | Equatorial Pacific  | 5283 | <0.002  | 0.15  | (17) |
| 85°22' W  | 05°30' S   | Peru Basin          | 4082 | 0.002   | 1.7   | (19) |
| 85°11' W  | 06°34' S   | Peru Basin          | 4165 | 0.0006  | 0.72  | (19) |
| 88°27' W  | 07°40' S   | Peru Basin          | 4127 | 0.0004  | 0.8   | (19) |
| 3.07 W    | 51.5 N     | Severn estuary      | 8    | 0.43    | 2.9   | (34) |
| 4.85 E    | 43.31 N    | Rhone zone          | 19   | 0.1     | 1.9   | (35) |
| 4.77 E    | 43.27 N    | Rhone shelf         | 74   | 0.5     | 1.5   | (36) |
| 10.34 E   | 56.11 N    | Aarhus Bay          | 15   | 0.32    | 3.8   | (37) |
| 13.78 E   | 54.8 N     | Arkona Basin        | 43   | 0.0074  | 3.9   | (38) |
| 7.97 E    | 54.08 N    | Helgoland Mud       | 29   | 1.3     | 1.1   | (39) |
| 9.75 E    | 57.92 N    | Skagerrak S10       | 86   | 0.5     | 1.4   | (40) |
| 9.7 E     | 57.95 N    | Skagerrak S11       | 150  | 0.5     | 0.7   | (41) |
| 9.6 E     | 58.05 N    | Skagerrak S13       | 386  | 0.5     | 2.1   | (42) |
| 63.02 E   | 24.88 N    | Arabian Sea         | 645  | 0.05    | 1.1   | (43) |
| 62.99 E   | 24.81 N    | Arabian Sea         | 957  | 0.05    | 0.95  | (44) |
| 62.99 E   | 24.71 N    | Arabian Sea         | 1586 | 0.05    | 0.92  | (45) |
| 168.8 W   | 54.57 N    | Bering Sea          | 1476 | 0.0016  | 1.6   | (46) |
| 53.59 W   | 39.31 S    | Argentine Basin     | 3687 | 0.008   | 1.2   | (47) |

3

4 **Reference for supplementary Table 4**

5 [1] Goldhaber, M. B., Aller, R. C., Cochran, J. K., Rosenfeld, J. K., Martens, C. S., & Berner, R. A.  
6 (1977). Sulfate reduction, diffusion, and bioturbation in Long Island Sound sediments; report of the  
7 FOAM Group. American Journal of Science, 277(3), 193-237.

- 8 [2] Froelich, P. N., Arthur, M. A., Burnett, W. C., Deakin, M., Hensley, V., Jahnke, R., ... &  
9 Vathakanon, C. (1988). Early diagenesis of organic matter in Peru continental margin sediments:  
10 phosphorite precipitation. *Marine Geology*, 80(3-4), 309-343.
- 11 [3] Müller, P. J., & Mangini, A. (1980). Organic carbon decomposition rates in sediments of the  
12 Pacific manganese nodule belt dated by  $^{230}\text{Th}$  and  $^{231}\text{Pa}$ . *Earth and planetary science letters*, 51(1),  
13 94-114.
- 14 [4] Reimers, C. E. (1982). Organic matter in anoxic sediments off central Peru: relations of porosity,  
15 microbial decomposition and deformation properties. *Marine Geology*, 46(3-4), 175-197.
- 16 [5] Reimers, C. E., & Suess, E. (1983). The partitioning of organic carbon fluxes and sedimentary  
17 organic matter decomposition rates in the ocean. *Marine Chemistry*, 13(2), 141-168.
- 18 [6] Waples, D. W., & Sloan, J. R. (1980). Carbon and nitrogen diagenesis in deep sea sediments.  
19 *Geochimica et Cosmochimica Acta*, 44(10), 1463-1470.
- 20 [7] Hamilton, S. E., & Hedges, J. I. (1988). The comparative geochemistries of lignins and  
21 carbohydrates in an anoxic fjord. *Geochimica et Cosmochimica Acta*, 52(1), 129-142.
- 22 [8] Heggie, D., Maris, C., Hudson, A., Dymond, J., Beach, R., & Cullen, J. (1987). Organic carbon  
23 oxidation and preservation in NW Atlantic continental margin sediments. *Geological Society*,  
24 London, Special Publications, 31(1), 215-236.
- 25 [9] Martens, C. S., & Klump, J. V. (1984). Biogeochemical cycling in an organic-rich coastal marine  
26 basin 4. An organic carbon budget for sediments dominated by sulfate reduction and methanogenesis.  
27 *Geochimica et Cosmochimica Acta*, 48(10), 1987-2004.
- 28 [10] Müller, P. J., & Mangini, A. (1980). Organic carbon decomposition rates in sediments of the  
29 Pacific manganese nodule belt dated by  $^{230}\text{Th}$  and  $^{231}\text{Pa}$ . *Earth and planetary science letters*, 51(1),  
30 94-114.
- 31 [11] Murray, J. W., Grundmanis, V., & Smethie Jr, W. M. (1978). Interstitial water chemistry in the  
32 sediments of Saanich Inlet. *Geochimica et Cosmochimica Acta*, 42(7), 1011-1026.
- 33 [12] Reimers, C. E., & Suess, E. (1983). The partitioning of organic carbon fluxes and sedimentary  
34 organic matter decomposition rates in the ocean. *Marine Chemistry*, 13(2), 141-168.
- 35 [13] Sholkovitz, E. (1973). Interstitial water chemistry of the Santa Barbara Basin sediments.  
36 *Geochimica et Cosmochimica Acta*, 37(9), 2043-2073.
- 37 [14] Henrichs, S. M., & Farrington, J. W. (1987). Early diagenesis of amino acids and organic matter  
38 in two coastal marine sediments. *Geochimica et Cosmochimica Acta*, 51(1), 1-15.
- 39 [15] Thomson, J., Higgs, N. C., & Colley, S. (1989). A geochemical investigation of reduction haloes  
40 developed under turbidites in brown clay. *Marine geology*, 89(3-4), 315-330.
- 41 [16] Dale, A. W., Brüchert, V., Alperin, M., & Regnier, P. (2009). An integrated sulfur isotope model  
42 for Namibian shelf sediments. *Geochimica et Cosmochimica Acta*, 73(7), 1924-1944.
- 43 [17] Grundmanis, V., & Murray, J. W. (1982). Aerobic respiration in pelagic marine sediments.  
44 *Geochimica et Cosmochimica Acta*, 46(6), 1101-1120.
- 45 [18] Kasih, G. A., Chiba, S., Yamagata, Y., Shimizu, Y., & Haraguchi, K. (2008). Modeling early  
46 diagenesis of sediment in Ago Bay, Japan: A comparison of steady state and dynamic calculations.  
47 *Ecological modelling*, 215(1-3), 40-54.
- 48 [19] Haeckel, M., König, I., Riech, V., Weber, M. E., & Suess, E. (2001). Pore water profiles and  
49 numerical modelling of biogeochemical processes in Peru Basin deep-sea sediments. *Deep Sea*  
50 *Research Part II: Topical Studies in Oceanography*, 48(17-18), 3713-3736.
- 51 [20] Hensen, C., & Wallmann, K. (2005). Methane formation at Costa Rica continental margin—

52 constraints for gas hydrate inventories and cross-décollement fluid flow. *Earth and Planetary*  
53 *Science Letters*, 236(1-2), 41-60.

54 [21] Mogollón, J. M., Dale, A. W., Fossing, H., & Regnier, P. (2012). Timescales for the  
55 development of methanogenesis and free gas layers in recently-deposited sediments of Arkona  
56 Basin (Baltic Sea). *Biogeosciences (BG)*, 9, 1915-1933.

57 [22] Morse, J. W., & Eldridge, P. M. (2007). A non-steady state diagenetic model for changes in  
58 sediment biogeochemistry in response to seasonally hypoxic/anoxic conditions in the “dead zone”  
59 of the Louisiana shelf. *Marine Chemistry*, 106(1-2), 239-255.

60 [23] Rojas, N., & Silva, N. (2005). Early diagenesis and vertical distribution of organic carbon and  
61 total nitrogen in recent sediments from southern Chilean fjords (Boca del Guafo to Pulluche  
62 Channel). *Investigaciones marinas*, 33(2), 183-194.

63 [24] Sauter, E. J., Schlüter, M., & Suess, E. (2001). Organic carbon flux and remineralization in  
64 surface sediments from the northern North Atlantic derived from pore-water oxygen microprofiles.  
65 *Deep Sea Research Part I: Oceanographic Research Papers*, 48(2), 529-553.

66 [25] Schlüter, M. (1991). Organic carbon flux and oxygen penetration into sediments of the Weddell  
67 Sea: indicators for regional differences in export production. *Marine chemistry*, 35(1-4), 569-579.

68 [26] Canavan, R. W., Slomp, C. P., Jourabchi, P., Van Cappellen, P., Laverman, A. M., & Van den  
69 Berg, G. A. (2006). Organic matter mineralization in sediment of a coastal freshwater lake and  
70 response to salinization. *Geochimica et Cosmochimica Acta*, 70(11), 2836-2855.

71 [27] Jørgensen, B. B., Jørgensen, B. B., & Parkes, R. J. (2010). Role of sulfate reduction and  
72 methane production by organic carbon degradation in eutrophic fjord sediments (Limfjorden,  
73 Denmark). *Limnology and Oceanography*, 55(3), 1338-1352.

74 [28] Paradis, S., Pusceddu, A., Masqué, P., Puig, P., Moccia, D., Russo, T., & Iacono, C. L. (2019).  
75 Organic matter contents and degradation in a highly trawled area during fresh particle inputs (Gulf  
76 of Castellammare, southwestern Mediterranean).

77 [29] Tishchenko, P. Y., Medvedev, E. V., Barabanshchikov, Y. A., Pavlova, G. Y., Sagalaev, S. G.,  
78 Tishchenko, P. P., ... & Orekhova, N. A. (2020). Organic Carbon and Carbonate System in the  
79 Bottom Sediments of Shallow Bights of the Peter the Great Bay (Sea of Japan). *Geochemistry*  
80 *International*, 58(6), 704-718.

81 [30] Wallmann, K., Aloisi, G., Haeckel, M., Obzhairov, A., Pavlova, G., & Tishchenko, P. (2006).  
82 Kinetics of organic matter degradation, microbial methane generation, and gas hydrate formation in  
83 anoxic marine sediments. *Geochimica et Cosmochimica Acta*, 70(15), 3905-3927.

84 [31] Luff, R., Wallmann, K., Grandel, S., & Schlüter, M. (2000). Numerical modeling of benthic  
85 processes in the deep Arabian Sea. *Deep Sea Research Part II: Topical Studies in Oceanography*,  
86 47(14), 3039-3072.

87 [32] Chuang, P. C., Yang, T. F., Wallmann, K., Matsumoto, R., Hu, C. Y., Chen, H. W., ... & Dale,  
88 A. W. (2019). Carbon isotope exchange during anaerobic oxidation of methane (AOM) in sediments  
89 of the northeastern South China Sea. *Geochimica et Cosmochimica Acta*, 246, 138-155.

90 [33] Dale, A. W., Sommer, S., Lomnitz, U., Montes, I., Treude, T., Liebetrau, V., ... & Bryant, L. D.  
91 (2015). Organic carbon production, mineralization and preservation on the Peruvian margin.  
92 *Biogeosciences (BG)*, 12, 1537-1559.

93 [34] Langston, W. J., Pope, N. D., Jonas, P. J. C., Nikitic, C., Field, M. D. R., Dowell, B., ... &  
94 Brown, A. R. (2010). Contaminants in fine sediments and their consequences for biota of the Severn  
95 Estuary. *Marine Pollution Bulletin*, 61(1-3), 68-82.

- 96 [35] Pastor, L., Deflandre, B., Viollier, E., Cathalot, C., Metzger, E., Rabouille, C., ... & Grémare,  
97 A. (2011). Influence of the organic matter composition on benthic oxygen demand in the Rhône  
98 River prodelta (NW Mediterranean Sea). *Continental Shelf Research*, 31(9), 1008-1019.
- 99 [36] Aquilina, A., Knab, N. J., Knittel, K., Kaur, G., Geissler, A., Kelly, S. P., ... & Pancost, R. D.  
100 (2010). Biomarker indicators for anaerobic oxidizers of methane in brackish-marine sediments with  
101 diffusive methane fluxes. *Organic Geochemistry*, 41(4), 414-426.
- 102 [37] Thingstad, T. F., Riemann, B. O., Havskum, H., & Garde, K. (1996). Incorporation rates and  
103 biomass content of C and P in phytoplankton and bacteria in the Bay of Aarhus (Denmark) June  
104 1992. *Journal of plankton research*, 18(1), 97-121.
- 105 [38] Fleming, V., & Kaitala, S. (2006). Phytoplankton spring bloom intensity index for the Baltic  
106 Sea estimated for the years 1992 to 2004. *Hydrobiologia*, 554(1), 57-65.
- 107 [39] Hebbeln, D., Scheurle, C., & Lamy, F. (2003). Depositional history of the Helgoland mud area,  
108 German Bight, North Sea. *Geo-Marine Letters*, 23(2), 81-90.
- 109 [40] Dahl, E., & Johannessen, T. (1998). Temporal and spatial variability of phytoplankton and  
110 chlorophyll a: lessons from the south coast of Norway and the Skagerrak. *ICES Journal of Marine  
111 Science*, 55(4), 680-687.
- 112 [41] Richardson, K., Rasmussen, B., Bunk, T., & Mouritsen, L. T. (2003). Multiple subsurface  
113 phytoplankton blooms occurring simultaneously in the Skagerrak. *Journal of plankton research*,  
114 25(7), 799-813.
- 115 [42] Trimmer, M., Engström, P., & Thamdrup, B. (2013). Stark contrast in denitrification and  
116 anammox across the deep Norwegian trench in the Skagerrak. *Applied and environmental  
117 microbiology*, 79(23), 7381-7389.
- 118 [43] Bard, E., Ménot, G., Rostek, F., Licari, L., Böning, P., Edwards, R. L., ... & Heaton, T. J. (2013).  
119 Radiocarbon calibration/comparison records based on marine sediments from the Pakistan and  
120 Iberian margins. *Radiocarbon*, 55(4), 1999-2019.
- 121 [44] Barlow, R. G., Mantoura, R. F. C., & Cummings, D. G. (1999). Monsoonal influence on the  
122 distribution of phytoplankton pigments in the Arabian Sea. *Deep Sea Research Part II: Topical  
123 Studies in Oceanography*, 46(3-4), 677-699.
- 124 [45] Koho, K. A., Nierop, K. G. J., Moodley, L., Middelburg, J. J., Pozzato, L., Soetaert, K., ... &  
125 Reichart, G. J. (2013). Microbial bioavailability regulates organic matter preservation in marine  
126 sediments. *Biogeosciences*, 10, 1131-1141.
- 127 [46] Coyle, K. O., Pinchuk, A. I., Eisner, L. B., & Napp, J. M. (2008). Zooplankton species  
128 composition, abundance and biomass on the eastern Bering Sea shelf during summer: the potential  
129 role of water-column stability and nutrients in structuring the zooplankton community. *Deep Sea  
130 Research Part II: Topical Studies in Oceanography*, 55(16-17), 1775-1791.
- 131 [47] Benthien, A., & Müller, P. J. (2000). Anomalously low alkenone temperatures caused by lateral  
132 particle and sediment transport in the Malvinas Current region, western Argentine Basin. *Deep Sea  
133 Research Part I: Oceanographic Research Papers*, 47(12), 2369-2393.

134

## 135 **2. Parameter sensitivity analysis for the *l*-RCM and the $\gamma$ -RCM**

136 We did parameter sensitivity analysis for  $\gamma$ -RCM and *l*-RCM, respectively. The results shown that  
137 when  $\nu$  is fixed value, the parameter  $a$  can vary over a wide range (from 10000 to 20000) while  
138 maintaining a relatively good fit ( $R^2 > 0.9$ ). However, when  $a$  is a fixed value, the variation of  
139 parameter  $\nu$  can cause a large fitting error. The results were shown in the Table S2 and Fig. S1.

140 Besides, we found when both  $a$  and  $v$  had a huge change,  $\gamma$ -RCM can also obtain a good fit result,  
 141 as shown in the Fig. S3.

142 **Table S2. Fitting results of parametric sensitivity analysis of  $\gamma$ -RCM**

| Sensitivity analysis of $\gamma$ -RCM |                             |           |            |                |                             |           |            |
|---------------------------------------|-----------------------------|-----------|------------|----------------|-----------------------------|-----------|------------|
| <b>BX-6</b>                           | <b><math>v=0.278</math></b> | $a=12.5$  | $R^2=0.82$ | <b>DSDP 58</b> | <b><math>v=1.08</math></b>  | $a=10224$ | $R^2=0.91$ |
|                                       |                             | $a=22.5$  | $R^2=0.93$ |                |                             | $a=12224$ | $R^2=0.92$ |
|                                       |                             | $a=32.5$  | $R^2=0.86$ |                |                             | $a=14224$ | $R^2=0.93$ |
|                                       |                             | $a=42.5$  | $R^2=0.74$ |                |                             | $a=16224$ | $R^2=0.92$ |
|                                       |                             | $a=52.5$  | $R^2=0.61$ |                |                             | $a=18224$ | $R^2=0.92$ |
|                                       |                             |           |            |                |                             | $a=20224$ | $R^2=0.92$ |
|                                       | <b><math>a=22.5</math></b>  | $v=0.178$ | $R^2=0.56$ |                | <b><math>a=20224</math></b> | $v=0.68$  | $R^2=0.63$ |
|                                       |                             | $v=0.278$ | $R^2=0.93$ |                |                             | $v=0.88$  | $R^2=0.84$ |
|                                       |                             | $v=0.378$ | $R^2=0.76$ |                |                             | $v=1.08$  | $R^2=0.92$ |
|                                       |                             |           |            |                |                             | $v=1.28$  | $R^2=0.93$ |
|                                       |                             |           |            |                |                             | $v=1.48$  | $R^2=0.91$ |

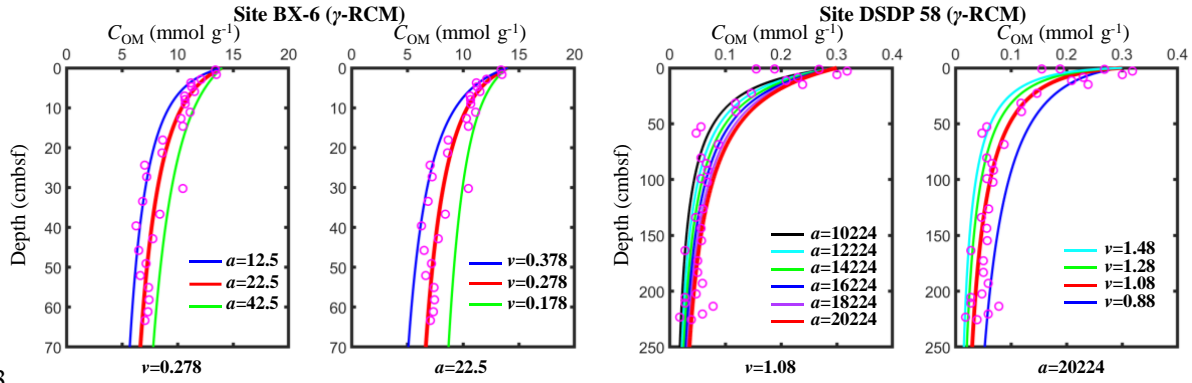

143

144

**Fig. S1. Parameter sensitivity analysis of  $\gamma$ -RCM.**

145 The  $l$ -RCM best-fit parameters are well fixed. According to the parametric sensitivity analysis, we  
 146 found that very small changes in parameters  $\mu$  and  $\sigma$  can cause large errors in the fitting results. The  
 147 results were shown in the Table S3 and Fig. S2.

148 **Table S3. Fitting results of parametric sensitivity analysis of  $l$ -RCM.**

| Sensitivity analysis of $l$ -RCM |                                                                    |                           |            |             |                                                                    |                            |            |
|----------------------------------|--------------------------------------------------------------------|---------------------------|------------|-------------|--------------------------------------------------------------------|----------------------------|------------|
| <b>BX-6</b>                      | <b><math>\mu=2.24</math></b><br><b><math>\times 10^{-3}</math></b> | $\sigma=1.031$            | $R^2=0.71$ | <b>DSDP</b> | <b><math>\mu=6.11</math></b><br><b><math>\times 10^{-5}</math></b> | $\sigma=0.663$             | $R^2=0.87$ |
|                                  |                                                                    | $\sigma=2.031$            | $R^2=0.93$ |             |                                                                    | $\sigma=1.663$             | $R^2=0.92$ |
|                                  |                                                                    | $\sigma=3.031$            | $R^2=0.88$ |             |                                                                    | $\sigma=2.663$             | $R^2=0.88$ |
|                                  |                                                                    | $\sigma=4.031$            | $R^2=0.83$ |             |                                                                    | $\sigma=3.663$             | $R^2=0.81$ |
|                                  |                                                                    |                           |            |             |                                                                    |                            |            |
|                                  | <b><math>\sigma=2.031</math></b>                                   | $\mu=1.24 \times 10^{-3}$ | $R^2=0.62$ |             | <b><math>\sigma=1.663</math></b>                                   | $\mu=3.11 \times 10^{-5}$  | $R^2=0.86$ |
|                                  |                                                                    | $\mu=2.24 \times 10^{-3}$ | $R^2=0.93$ |             |                                                                    | $\mu=6.11 \times 10^{-5}$  | $R^2=0.92$ |
|                                  |                                                                    | $\mu=3.24 \times 10^{-3}$ | $R^2=0.89$ |             |                                                                    | $\mu=9.11 \times 10^{-5}$  | $R^2=0.87$ |
|                                  |                                                                    | $\mu=4.24 \times 10^{-3}$ | $R^2=0.82$ |             |                                                                    | $\mu=12.11 \times 10^{-5}$ | $R^2=0.82$ |

149



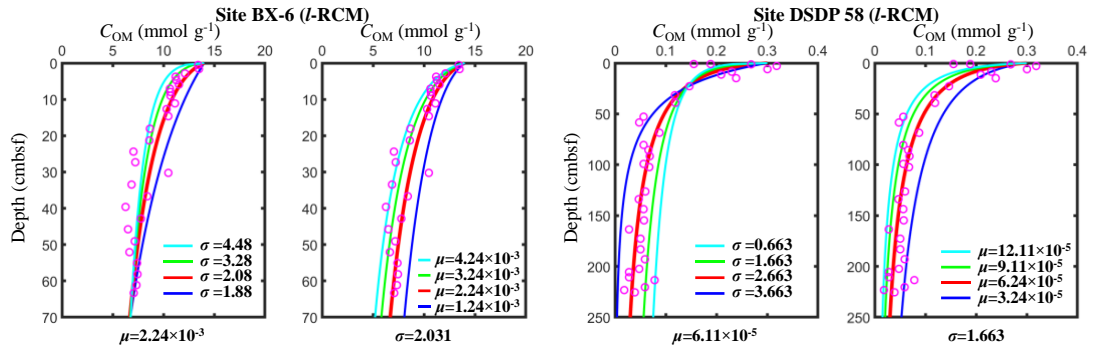

Fig. S2. Parameter sensitivity analysis of *l*-RCM.

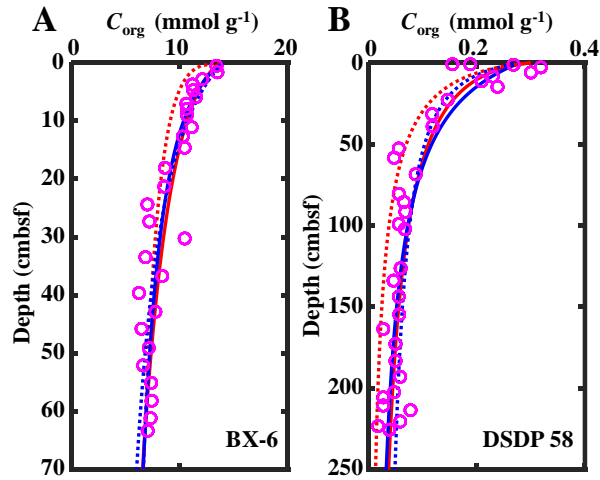

Fig. S3. A: pink circles are measured OM data. The red solid ( $\mu=2.23 \times 10^{-3}$ ,  $\sigma=2.03$ ,  $R^2=0.93$ ) and dotted lines ( $\mu=2.23 \times 10^{-3}$ ,  $\sigma=1.03$ ,  $R^2=0.82$ ) are the results of *l*-RCM, the blue solid ( $\nu=0.278$ ,  $a=22.5$ ,  $R^2=0.93$ ) and dotted lines ( $\nu=0.5$ ,  $a=53$ ,  $R^2=0.91$ ) are the results of  $\gamma$ -RCM. B: pink circles are measured OM data. The red solid ( $\mu=6.11 \times 10^{-5}$ ,  $\sigma=1.66$ ,  $R^2=0.92$ ) and dotted lines ( $\mu=8.8 \times 10^{-5}$ ,  $\sigma=1.36$ ,  $R^2=0.78$ ) are the results of *l*-RCM, the blue solid ( $\nu=1.08$ ,  $a=20225$ ,  $R^2=0.92$ ) and dotted lines ( $\nu=0.5$ ,  $a=4024$ ,  $R^2=0.89$ ) are the results of  $\gamma$ -RCM.
